# Supplementary material for: [VO(H2O)5]H[PMo12O40]-catalyzed nitration of alkanes with nitric acidElectronic supplementary information (ESI) available: Experimental section. See http://www.rsc.org/suppdata/cc/b3/b314978a/
Source: Royal Society of Chemistry journal article supplement (doi:10.1039/b314978a), 2004-01-01
Supplement: b314978a.doc [file b314978a.doc]

Supporting Information for

**[VO(H2O)5]H[PMo12O40]-catalyzed nitration of alkanes**

**with nitric acid**

Kazuya Yamaguchi, Satoshi Shinachi and Noritaka Mizuno*

## *Department of Applied Chemistry, School of Engineering, The University of Tokyo, 7-3-1 Hongo, Bunkyo-ku, Tokyo 113-8656, Japan. Fax: +81-3-5841-7220; Tel: +81-3-5841-7272; E-mail: tmizuno@mail.ecc.u-tokyo.ac.jp*

# Experimental

**Materials and Instrumentations**

H3PMo12O40 was purchased from Kanto and used as received. H4PVMo11O4010 and [VO(H2O)5]H[PMo12O40]11 were synthesized according to the literature procedures. Solvents and concentrated nitric acid (69 wt%) were of analytical grade (Tokyo Kasei) and used without further purification. Alkanes used in the nitration reactions were reagent grade from Tokyo Kasei or Aldrich and purified prior to the use. GC analyses were performed on Shimadzu GC-14B with a flame ionization detector equipped with a TC-WAX capillary or SE-30 packed column. Mass spectra were determined on Perkin Elmer TurboMass at an ionization voltage of 70 eV. NMR spectra were recorded on JEOL JNM-EX-270. 1H and 13C NMR spectra were measured at 270 and 67.5 MHz, respectively, in CDCl3 with TMS as an internal standard.

**Procedure for Catalytic Nitration**

Nitration of alkanes was carried out in a glass vial containing a magnetic stir bar. A typical procedure was as follows. Into a glass vial were successively placed adamantane (1 mmol, 0.33 M), [VO(H2O)5]H[PMo12O40] (1.67 mM, 0.5 mol%), acetic acid (3 mL), and nitric acid (2 mmol, 0.67 M). The grass reactor was then attached to a vacuum line, cooled to 77 K, and degassed by three freeze-pump-thaw cycle. The vial was allowed to worm to 298 K and 1 atm of argon was introduced to the system. Then, reaction mixture was heated at 356 K for 24 h. All of the products were confirmed by GC analysis in combination with mass and 1H and 13C NMR spectroscopy as reported previously.7,12 The yields were determined by GC analyses using naphthalene or diphenyl as an internal standard.

**References**

10 G. T. Tsigdinos and C. J. Hallada, *Inorg. Chem.,* 1968, **7**, 437.

11 R. Bayer, C. Marchal, F. X. Liu, A. Tézé and G. Hervé, *J. Mol. Catal., A* 1996, **110**, 65.

12 (a) R. W. Murray, R. Jeyaraman and L. Mohan, *Tetrahedron Lett*., 1986, **27**, 2335; (b) K. A. Turner, *Synthesis,* 1998, 139; (c) J. K. Gallos and T. V. Koftis, *J. Chem. Soc., Perkin Trans. 1,* 2001, 415.
